# Supplementary material
Source: PubMed Central journal article supplement (PMC3889610)
Supplement: JB.01060-13_zjb999092938so1.pdf [file JB.01060-13_zjb999092938so1.pdf]

Table S1:

| Species (indicator strain)       | Group      | Zone of inhibition diameter (mm) |                |
|----------------------------------|------------|----------------------------------|----------------|
|                                  |            | GS-5                             | $\Delta$ smbAB |
| <i>S. uberis</i> (UT387)         | Pyogenic   | 26.0 ± 2.0                       | 12.0 ± 1.0     |
| <i>S. agalactiae</i> (NEM306)    | Pyogenic   | 18.0 ± 0.5                       | 4.0 ± 1.0      |
| <i>S. agalactiae</i> (A909)      | Pyogenic   | 19.0 ± 1.0                       | 4.0 ± 1.0      |
| <i>S. dysgalactiae</i> (CI)      | Pyogenic   | 26.0 ± 1.0                       | 0.0 ± 0.0      |
| <i>S. iniae</i> (K388)           | Pyogenic   | 31.0 ± 1.0                       | 7.0 ± 1.0      |
| <i>S. pyogenes</i> (JRS4)*       | Pyogenic   | 26.0 ± 1.0                       | 9.5 ± 1.5      |
| <i>S. pyogenes</i> (AM3)         | Pyogenic   | 24.0 ± 1.0                       | 10.5 ± 1.5     |
| <i>S. pyogenes</i> (K32)         | Pyogenic   | 28.0 ± 1.0                       | 10.5 ± 1.5     |
| <i>S. anginosus</i> (CI)         | Anginosus  | 16.0 ± 1.0                       | 4.5 ± 0.5      |
| <i>S. constellatus</i> (CI)      | Anginosus  | 10.0 ± 1.0                       | 4.5 ± 0.5      |
| <i>S. gordonii</i> (DL-1)*       | Mitis      | 9.5 ± 0.5                        | 4.0 ± 0.5      |
| <i>S. gordonii</i> (M5)          | Mitis      | 11.5 ± 1.5                       | 6.5 ± 0.5      |
| <i>S. gordonii</i> (ATCC10558)   | Mitis      | 12.5 ± 3.5                       | 6.0 ± 1.0      |
| <i>S. pneumoniae</i> (ATCC 6303) | Mitis      | 10.0 ± 1.0                       | 1.0 ± 0.5      |
| <i>S. pneumoniae</i> (ATCC49619) | Mitis      | 11.5 ± 1.5                       | 0.0 ± 0.0      |
| <i>S. pneumoniae</i> (ATCC43079) | Mitis      | 13.5 ± 0.5                       | 1.5 ± 1.0      |
| <i>S. sanguinis</i> (SK36)*      | Mitis      | 23.0 ± 1.0                       | 0.0 ± 0.0      |
| <i>S. oralis</i> (NCTC7864)      | Mitis      | 7.0 ± 1.0                        | 0.0 ± 0.0      |
| <i>S. mitis</i> (CI)             | Mitis      | 4.5 ± 0.5                        | 3.5 ± 0.5      |
| <i>S. salivarius</i> (ATCC25975) | Salivarius | 15.0 ± 1.0                       | 6.0 ± 1.0      |
| <i>S. salivarius</i> (BAA491)    | Salivarius | 24.0 ± 1.0                       | 0.0 ± 0.0      |
| <i>S. gallolyticus</i> (TX20005) | Bovis      | 12.0 ± 1.0                       | 1.5 ± 0.5      |
| <i>S. gallolyticus</i> (BAA2069) | Bovis      | 22.0 ± 2.0                       | 3.0 ± 0.5      |
| <i>S. gallolyticus</i> (43143)   | Bovis      | 25.0 ± 1.0                       | 1.0 ± 0.5      |
| <i>S. equinus</i> (ATCC700410)   | Bovis      | 20.0 ± 1.0                       | 0.0 ± 0.0      |
| <i>S. downei</i> (ATCC 33798)    | Mutans     | 14.0 ± 1.0                       | 0.0 ± 0.0      |
| <i>S. sobrinus</i> (6715)        | Mutans     | 7.0 ± 1.0                        | 0.0 ± 0.0      |
| <i>S. sobrinus</i> ATCC 27352    | Mutans     | 7.0 ± 0.5                        | 0.0 ± 0.0      |
| <i>S. sobrinus</i> ATCC33478     | Mutans     | 5.5 ± 0.5                        | 0.0 ± 0.0      |
| <i>S. criceti</i> AHT            | Mutans     | 7.0 ± 0.5                        | 0.0 ± 0.0      |
| <i>S. ratti</i> FA-1             | Mutans     | 6.0 ± 0.5                        | 0.0 ± 0.0      |
| <i>S. ratti</i> BHT              | Mutans     | 9.0 ± 0.5                        | 0.0 ± 0.0      |
| <i>L. lactis</i> MG1363          | Other      | 20.0 ± 6.0                       | 2.0 ± 2.0      |
| <i>E. faecalis</i> OG1X          | Other      | 7.5 ± 0.5                        | 3.5 ± 0.5      |
| <i>L. rhamnosus</i> (CI)         | Other      | 22.0 ± 1.0                       | 7.0 ± 1.0      |
| <i>Staph. epidermidis</i> 1457   | Other      | 0.0 ± 0.0                        | 0.0 ± 0.0      |
| <i>B. subtilis</i> JH642         | Other      | 0.0 ± 0.0                        | 0.0 ± 0.0      |

CI, Clinical isolate. \*, Strains used for heterologous expression of SmbFT

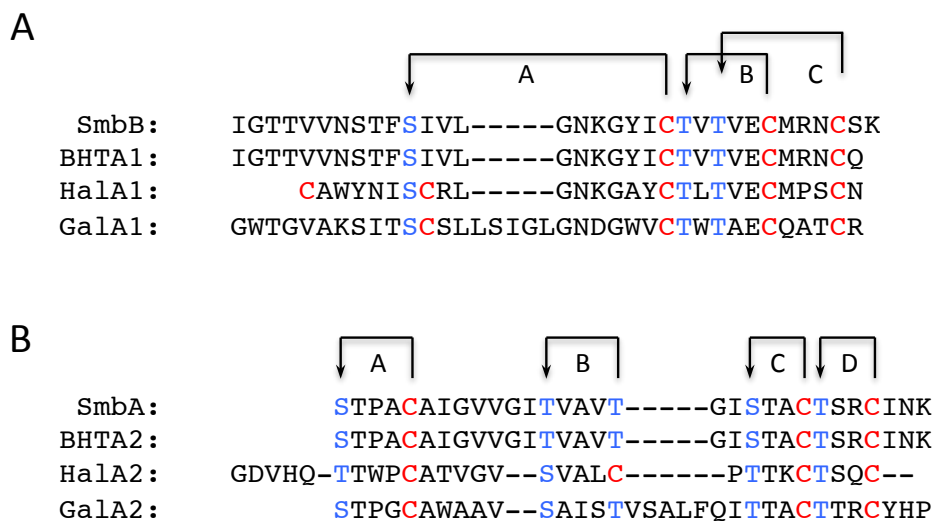

**Figure S1:** Sequence alignment of two-component lantibiotics closely related to Smb. The  $\alpha$  peptide (A1) is encoded by SmbB while the  $\beta$ -peptide (A2) by SmbA. Other sequences were retrieved from GenBank and they are: *S. ratti* BHT strain BHTA1 (AAZ76603) and BHTA2 (AAZ76602); *Bacillus halodurans* C-125 HalA1 (NP\_241320) and HalA2 (NP\_241319); and *S. galloyticus* BAA 2069 SGALA1 (YP\_004287012). The GALA2 peptide was not annotated in the BAA 2069 genome and was identified by analyzing the untranslated sequence near the GALA1 coding region. Curved arrows indicate residues involved in putative and/or established ring structure formation and the letters inside the arrows indicate the ring designation in the structure
